# Supplementary material
Source: PubMed Central journal article supplement (PMC3302242)
Supplement: supp_86.5.2545_TableS1.pdf [file supp_86.5.2545_TableS1.pdf]

**Supplementary Table 1. Raw data of Fig. 2**

| ORF# | Relative expression (mutant/T3) |             |             |             |
|------|---------------------------------|-------------|-------------|-------------|
|      | FB                              | TR          | SG          | MG          |
| T3   | 1                               | 1           | 1           | 1           |
| 7    | 1.695016779                     | 0.930776987 | 6.580501009 | 0.952194152 |
| 8    | 0.659056305                     | 0.624238955 | 2.972428162 | 0.258776439 |
| 9    | 1.45020881                      | 1.328894982 | 55.25752099 | 0.907329846 |
| 11   | 0.007184235                     | 0.034907015 | 0.035729472 | 0.052920853 |
| 12   | 0.080454793                     | 0.322800019 | 0.219563522 | 0.750547566 |
| 14   | 0.089966869                     | 0.174694776 | 0.097787273 | 0.080043424 |
| 18   | 0.090847767                     | 0.316779269 | 0.271035275 | 0.128094668 |
| 21   | 0.765581532                     | 1.084813327 | 1.383606444 | 1.317546409 |
| 24   | 0.250109316                     | 0.205765246 | 0.07228726  | 0.028478718 |
| 26   | 0.955452899                     | 0.783892353 | 1.181655052 | 0.420862167 |
| 27   | 0.838615859                     | 1.286740061 | 0.892481815 | 1.215563047 |
| 29   | 0.027637797                     | 0.012983658 | 0.015045298 | 0.018582525 |
| 33   | 0.935704947                     | 0.599979508 | 0.628518845 | 0.273338309 |
| 34   | 0.187385226                     | 0.285585058 | 0.105941065 | 0.032503193 |
| 35   | 0.782066559                     | 0.991029783 | 0.751939498 | 0.522329784 |
| 37   | 0.316845731                     | 0.621216727 | 0.325294942 | 0.351005983 |
| 41   | 1.324357565                     | 0.42517989  | 1.640143745 | 0.630754469 |
| 44   | 0.243016011                     | 0.146973643 | 0.55276799  | 0.234886671 |
| 47   | 0.639794773                     | 0.356501937 | 0.59511655  | 0.096373026 |
| 49   | 0.153286944                     | 0.043977146 | 0.103133178 | 0.224284394 |
| 51   | 0.835728193                     | 1.061958135 | 0.941389864 | 0.615871413 |
| 52   | 1.002940501                     | 1.033901087 | 1.820675106 | 0.873272675 |
| 56   | 0.780211184                     | 0.709185986 | 1.873337984 | 0.688608749 |
| 60   | 1.050757318                     | 1.15411559  | 0.818303092 | 1.031358611 |
| 70   | 0.419672258                     | 0.405478199 | 0.238926506 | 0.065679517 |
| 71   | 0.117275124                     | 0.253952315 | 0.383761549 | 0.089115872 |
| 74   | 0.178771718                     | 0.376899292 | 0.391779574 | 0.542093747 |
| 89   | 0.391780103                     | 0.329691964 | 0.439906703 | 0.140124978 |
| 94   | 0.47458054                      | 0.520330589 | 0.203722155 | 0.068210423 |
| 95   | 0.460920348                     | 0.830964278 | 0.26363783  | 0.457382201 |
| 96   | 1.401979066                     | 1.384871799 | 1.251026524 | 1.773723588 |
| 106  | 0.595860672                     | 0.797439678 | 1.516285401 | 1.612456691 |
| 107  | 0.475933482                     | 0.276568355 | 0.780555444 | 0.195725897 |
| 108  | 0.422937489                     | 0.373431167 | 0.160428727 | 0.183806646 |
| 111  | 0.658204025                     | 0.76348912  | 0.853513925 | 0.92410112  |
| 112  | 0.710228359                     | 1.102588705 | 1.91298689  | 1.131740361 |
| 115  | 0.518937144                     | 0.285009712 | 0.550442704 | 0.301604174 |
| 121  | 0.249098623                     | 0.288673468 | 0.110438059 | 0.647444848 |
| 124  | 0.530492629                     | 0.790924127 | 0.467176176 | 0.717234664 |
| 127  | 1.791443181                     | 1.620642987 | 1.626482938 | 0.957487887 |
| 129  | 0.824558762                     | 1.034224025 | 0.468893781 | 0.422163736 |
| 130  | 0.870315684                     | 0.657690598 | 0.532871853 | 0.257935847 |
| 133  | 0.827290366                     | 0.528938165 | 0.744469122 | 0.323235837 |
| 134  | 0.396866848                     | 0.34175665  | 0.806114328 | 0.250026062 |
